# Supplementary material
Source: publisher site journal article supplement (https://www.dovepress.com/article/543296)
Supplement: Supplementary file 1 [file 543296%20Supplementary%20Material.docx]

**Supplementary** **material**

**Table S1. SNPs significantly associated with T2DM at the genome-wide level**

| chr.exposure | pos.exposure | beta.exposure | se.exposure | pval.exposure | SNP | effect_allele.exposure | other_allele.exposure | eaf.exposure |
| --- | --- | --- | --- | --- | --- | --- | --- | --- |
| 1 | 146692174 | -0.0557 | 0.0082 | 8.75E-12 | rs10900325 | C | T | 0.841826 |
| 1 | 177852580 | 0.0491 | 0.0075 | 5.66E-11 | rs633715 | C | T | 0.218583 |
| 1 | 117532790 | -0.042 | 0.0066 | 2.54E-10 | rs1127215 | T | C | 0.368543 |
| 1 | 214159256 | 0.0535 | 0.0063 | 3.51E-17 | rs340874 | C | T | 0.493303 |
| 1 | 39995074 | 0.0617 | 0.0077 | 1.45E-15 | rs755249 | T | C | 0.217225 |
| 1 | 51457200 | -0.0876 | 0.0124 | 1.97E-12 | rs72906810 | G | A | 0.0894907 |
| 1 | 120554048 | 0.0824 | 0.0137 | 1.87E-09 | rs406767 | C | T | 0.109092 |
| 1 | 229672955 | -0.0539 | 0.0068 | 3.36E-15 | rs348330 | A | G | 0.543403 |
| 1 | 22112174 | -0.0497 | 0.0077 | 1.09E-10 | rs11802899 | A | C | 0.817422 |
| 2 | 227092405 | 0.0754 | 0.0078 | 6.57E-22 | rs1515104 | A | T | 0.719318 |
| 2 | 218783532 | 0.0738 | 0.0134 | 3.58E-08 | rs16858462 | C | G | 0.0525964 |
| 2 | 27730940 | 0.071 | 0.0064 | 6.44E-29 | rs1260326 | C | T | 0.571429 |
| 2 | 44810480 | 0.0421 | 0.0075 | 1.76E-08 | rs10201401 | A | G | 0.787528 |
| 2 | 60586707 | 0.0492 | 0.0066 | 6.40E-14 | rs243018 | G | C | 0.509473 |
| 2 | 165437736 | 0.0436 | 0.0068 | 1.80E-10 | rs12692723 | G | C | 0.311541 |
| 2 | 16574669 | 0.0633 | 0.0108 | 4.38E-09 | rs11680058 | A | G | 0.879274 |
| 2 | 58933591 | -0.0372 | 0.0064 | 4.67E-09 | rs1861410 | T | C | 0.573342 |
| 2 | 111934977 | -0.0386 | 0.0063 | 1.16E-09 | rs10169613 | T | C | 0.446602 |
| 2 | 149515723 | -0.0465 | 0.0082 | 1.28E-08 | rs2382249 | G | A | 0.217601 |
| 2 | 638107 | 0.0688 | 0.0091 | 5.22E-14 | rs4854343 | A | G | 0.849205 |
| 2 | 43529508 | -0.1062 | 0.0141 | 5.86E-14 | rs10173251 | G | C | 0.11235 |
| 2 | 65280894 | -0.0429 | 0.007 | 9.23E-10 | rs71424153 | C | G | 0.259162 |
| 2 | 165528624 | -0.0786 | 0.0078 | 9.30E-24 | rs1128249 | T | G | 0.300292 |
| 2 | 196663615 | -0.0385 | 0.0064 | 1.52E-09 | rs4358140 | G | C | 0.561178 |
| 2 | 234364426 | -0.0375 | 0.0063 | 3.29E-09 | rs2034761 | G | T | 0.429369 |
| 3 | 47693664 | 0.0876 | 0.0148 | 2.95E-09 | rs62262091 | T | C | 0.0970158 |
| 3 | 64722045 | -0.0365 | 0.0065 | 2.21E-08 | rs12108088 | A | G | 0.439211 |
| 3 | 123054770 | -0.1004 | 0.0104 | 3.96E-22 | rs72964564 | C | A | 0.231426 |
| 3 | 113026691 | 0.041 | 0.0067 | 9.51E-10 | rs6438138 | T | A | 0.306114 |
| 3 | 124921457 | 0.0373 | 0.0065 | 7.63E-09 | rs9873519 | T | C | 0.487086 |
| 3 | 150097635 | 0.1036 | 0.0176 | 4.26E-09 | rs9844972 | C | G | 0.0666559 |
| 3 | 186665645 | 0.053 | 0.0063 | 3.30E-17 | rs3887925 | T | C | 0.49964 |
| 3 | 12329783 | -0.1092 | 0.0112 | 1.73E-22 | rs17036160 | T | C | 0.105331 |
| 3 | 23455582 | -0.0881 | 0.0078 | 1.36E-29 | rs35352848 | C | T | 0.213447 |
| 3 | 64004819 | -0.0693 | 0.0074 | 1.06E-20 | rs2578011 | T | C | 0.204526 |
| 3 | 187705040 | -0.0599 | 0.0101 | 3.54E-09 | rs13086642 | A | G | 0.092455 |
| 3 | 170630520 | -0.0499 | 0.008 | 4.99E-10 | rs13073970 | T | G | 0.193647 |
| 3 | 185497552 | 0.126 | 0.0067 | 3.08E-79 | rs5855072 | TA | T | 0.318578 |
| 4 | 1286339 | -0.076 | 0.0089 | 1.47E-17 | rs35385487 | G | A | 0.11622 |
| 4 | 6304087 | 0.0999 | 0.0087 | 1.63E-30 | rs1046316 | G | A | 0.745203 |
| 4 | 85299808 | -0.1202 | 0.0168 | 8.51E-13 | rs141330165 | T | C | 0.0560573 |
| 4 | 96145415 | 0.0371 | 0.0066 | 1.95E-08 | rs62319060 | C | T | 0.470491 |
| 4 | 71735967 | -0.0718 | 0.0103 | 3.84E-12 | rs6853272 | T | C | 0.923642 |
| 4 | 140893287 | -0.039 | 0.0068 | 1.11E-08 | rs56218782 | C | T | 0.312633 |
| 4 | 718868 | 0.0933 | 0.016 | 6.13E-09 | rs73221113 | A | G | 0.039939 |
| 4 | 52776901 | 0.0366 | 0.0066 | 3.59E-08 | rs6554060 | G | A | 0.376916 |
| 4 | 153520475 | -0.062 | 0.0066 | 4.38E-21 | rs6813195 | T | C | 0.353285 |
| 4 | 45186139 | 0.0491 | 0.0065 | 5.39E-14 | rs10938398 | A | G | 0.406542 |
| 5 | 55808342 | 0.06 | 0.0066 | 9.51E-20 | rs392794 | T | C | 0.659966 |
| 5 | 76427311 | -0.0547 | 0.0092 | 2.46E-09 | rs6878122 | A | G | 0.778957 |
| 5 | 102143311 | 0.1309 | 0.0187 | 2.59E-12 | rs76177300 | A | G | 0.0551313 |
| 5 | 49673818 | 0.0849 | 0.0155 | 3.93E-08 | rs116947250 | A | T | 0.031514 |
| 5 | 52072194 | 0.0647 | 0.0072 | 3.47E-19 | rs2648731 | A | G | 0.240353 |
| 5 | 74692776 | -0.0438 | 0.0065 | 1.56E-11 | rs6453133 | G | A | 0.357642 |
| 5 | 87943345 | 0.0546 | 0.0075 | 4.28E-13 | rs13162708 | T | C | 0.208377 |
| 5 | 176516631 | -0.0465 | 0.0068 | 6.92E-12 | rs1966265 | A | G | 0.322278 |
| 5 | 14768092 | -0.0449 | 0.0077 | 5.18E-09 | rs6885132 | G | C | 0.195176 |
| 5 | 95867908 | -0.0417 | 0.0075 | 2.59E-08 | rs10062657 | A | C | 0.799903 |
| 6 | 7231843 | -0.0816 | 0.0085 | 1.04E-21 | rs9379084 | A | G | 0.156857 |
| 6 | 34193230 | 0.0899 | 0.012 | 7.64E-14 | rs1776899 | A | G | 0.943992 |
| 6 | 126964510 | 0.0577 | 0.0066 | 2.98E-18 | rs4273712 | G | A | 0.320615 |
| 6 | 156976650 | 0.0625 | 0.0111 | 1.68E-08 | rs6919504 | G | A | 0.0677522 |
| 6 | 31296247 | 0.0625 | 0.0067 | 6.28E-21 | rs9265433 | C | T | 0.445483 |
| 6 | 31442748 | -0.0618 | 0.011 | 2.11E-08 | rs7741521 | A | G | 0.0717495 |
| 6 | 32573760 | 0.1974 | 0.036 | 4.13E-08 | rs146733600 | T | C | 0.0153401 |
| 6 | 32710407 | 0.284 | 0.0238 | 7.30E-33 | rs115018313 | C | T | 0.0309476 |
| 6 | 76199697 | -0.0468 | 0.0085 | 3.66E-08 | rs17496664 | T | C | 0.277089 |
| 6 | 118050841 | -0.0627 | 0.0078 | 1.24E-15 | rs72951548 | T | C | 0.188488 |
| 6 | 20519120 | 0.0482 | 0.0077 | 3.27E-10 | rs72830608 | T | G | 0.305978 |
| 6 | 20686996 | 0.1551 | 0.0066 | 2.04E-122 | rs9368222 | A | C | 0.318552 |
| 6 | 32789739 | 0.2125 | 0.0219 | 3.20E-22 | rs73410774 | T | G | 0.0374096 |
| 6 | 50787459 | 0.0565 | 0.0082 | 4.60E-12 | rs62405419 | T | G | 0.156975 |
| 6 | 137288760 | -0.0548 | 0.0063 | 6.16E-18 | rs12662968 | T | A | 0.505259 |
| 6 | 43757082 | 0.0448 | 0.0063 | 1.22E-12 | rs4711750 | A | T | 0.513192 |
| 6 | 143170972 | -0.0465 | 0.0074 | 4.38E-10 | rs972119 | G | A | 0.215533 |
| 6 | 160776017 | -0.0364 | 0.0065 | 2.39E-08 | rs543159 | A | C | 0.427571 |
| 7 | 69061966 | 0.0683 | 0.0107 | 2.10E-10 | rs2270162 | G | C | 0.0724056 |
| 7 | 69783013 | 0.0586 | 0.0071 | 1.23E-16 | rs12698897 | A | T | 0.256189 |
| 7 | 1873406 | 0.0454 | 0.0081 | 2.54E-08 | rs10268294 | A | C | 0.796446 |
| 7 | 130430930 | -0.0484 | 0.0065 | 1.31E-13 | rs4731701 | T | C | 0.43764 |
| 7 | 150541189 | 0.0418 | 0.0069 | 1.66E-09 | rs1117610 | T | A | 0.312695 |
| 7 | 14898282 | 0.0626 | 0.0071 | 1.57E-18 | rs17168486 | T | C | 0.238504 |
| 7 | 15059272 | 0.0601 | 0.0063 | 8.55E-22 | rs11514706 | C | A | 0.500501 |
| 7 | 74088893 | 0.0553 | 0.0093 | 2.67E-09 | rs35473599 | A | G | 0.182945 |
| 7 | 127851628 | 0.0571 | 0.0082 | 4.22E-12 | rs7778167 | A | G | 0.216676 |
| 7 | 13892902 | 0.0361 | 0.0063 | 1.08E-08 | rs10950494 | A | G | 0.450764 |
| 7 | 28194397 | -0.0668 | 0.0068 | 9.18E-23 | rs860262 | A | C | 0.420673 |
| 7 | 89765708 | 0.0401 | 0.0067 | 2.58E-09 | rs39254 | T | G | 0.46123 |
| 7 | 102410477 | -0.0786 | 0.0111 | 1.82E-12 | rs139722172 | G | C | 0.186009 |
| 7 | 44188220 | 0.0411 | 0.0063 | 8.62E-11 | rs2010825 | C | T | 0.519789 |
| 7 | 156968323 | -0.0511 | 0.0064 | 2.20E-15 | rs1002389 | G | C | 0.392781 |
| 8 | 41537318 | -0.1018 | 0.0085 | 1.01E-32 | rs62508166 | A | G | 0.178231 |
| 8 | 41666299 | -0.0821 | 0.0117 | 2.08E-12 | rs1362891 | A | G | 0.0714984 |
| 8 | 30822094 | -0.0408 | 0.0073 | 2.82E-08 | rs6985028 | A | G | 0.656712 |
| 8 | 95911477 | -0.0381 | 0.0065 | 4.66E-09 | rs12546365 | C | T | 0.55818 |
| 8 | 118184783 | -0.1053 | 0.0065 | 1.97E-59 | rs13266634 | T | C | 0.348803 |
| 9 | 34074476 | 0.0367 | 0.0064 | 1.02E-08 | rs12001437 | C | T | 0.413559 |
| 9 | 84308948 | -0.0679 | 0.0063 | 1.11E-26 | rs2796441 | A | G | 0.472771 |
| 9 | 136147160 | 0.0443 | 0.0064 | 4.19E-12 | rs554833 | T | C | 0.376316 |
| 9 | 139248082 | 0.1006 | 0.0079 | 3.80E-37 | rs28642213 | G | A | 0.773252 |
| 9 | 4283137 | -0.065 | 0.0063 | 1.17E-24 | rs1574285 | T | G | 0.583008 |
| 9 | 22133284 | -0.1644 | 0.0073 | 7.73E-114 | rs10965250 | A | G | 0.235558 |
| 9 | 1033773 | 0.0403 | 0.0065 | 7.25E-10 | rs1567353 | G | C | 0.340343 |
| 9 | 22288140 | -0.0944 | 0.0151 | 4.09E-10 | rs7030811 | A | T | 0.0395381 |
| 9 | 81908202 | -0.0727 | 0.0122 | 2.57E-09 | rs13292347 | C | T | 0.0708271 |
| 10 | 63732315 | -0.0727 | 0.0102 | 1.03E-12 | rs75872811 | G | A | 0.0871287 |
| 10 | 77221514 | -0.0387 | 0.0063 | 7.08E-10 | rs11001398 | C | G | 0.545685 |
| 10 | 94520143 | 0.0624 | 0.01 | 4.50E-10 | rs12763565 | G | T | 0.134488 |
| 10 | 80942855 | -0.0668 | 0.0063 | 1.36E-26 | rs703981 | C | G | 0.458839 |
| 10 | 94253183 | 0.0631 | 0.0099 | 2.06E-10 | rs3837333 | CT | C | 0.123884 |
| 10 | 114754071 | 0.2972 | 0.0091 | 1.00E-200 | rs34872471 | C | T | 0.207525 |
| 10 | 12598322 | 0.0348 | 0.0063 | 3.50E-08 | rs2815625 | A | C | 0.453483 |
| 10 | 94463779 | -0.1118 | 0.0065 | 2.73E-65 | rs1977832 | T | G | 0.502983 |
| 10 | 12307894 | 0.1084 | 0.0069 | 2.36E-55 | rs11257655 | T | C | 0.281992 |
| 10 | 12403619 | 0.0895 | 0.0162 | 3.03E-08 | rs113082607 | C | A | 0.0312395 |
| 10 | 114736670 | -0.2281 | 0.0301 | 3.23E-14 | rs114322470 | G | T | 0.0204657 |
| 10 | 122947203 | -0.0683 | 0.0114 | 2.41E-09 | rs17101591 | T | C | 0.0577437 |
| 11 | 69459036 | -0.1776 | 0.0252 | 1.74E-12 | rs3918296 | G | C | 0.0192566 |
| 11 | 128389391 | 0.0493 | 0.0077 | 1.27E-10 | rs11819995 | T | C | 0.213049 |
| 11 | 35433712 | -0.0807 | 0.0136 | 2.61E-09 | rs58090211 | A | C | 0.0766814 |
| 11 | 2196424 | -0.0706 | 0.0079 | 2.76E-19 | rs4930045 | C | T | 0.705243 |
| 11 | 2858546 | -0.2678 | 0.009 | 1.24E-196 | rs2237897 | T | C | 0.249812 |
| 11 | 49910841 | -0.0449 | 0.0078 | 6.93E-09 | rs1794138 | G | T | 0.516893 |
| 11 | 65346178 | -0.0411 | 0.0068 | 1.76E-09 | rs11607147 | C | T | 0.684232 |
| 11 | 17408630 | -0.0623 | 0.0064 | 2.41E-22 | rs5215 | T | C | 0.616015 |
| 11 | 72460398 | -0.1028 | 0.01 | 5.67E-25 | rs77464186 | C | A | 0.141673 |
| 11 | 92708710 | 0.0504 | 0.0065 | 1.20E-14 | rs10830963 | G | C | 0.330035 |
| 12 | 27964996 | -0.0715 | 0.0073 | 1.73E-22 | rs12578595 | T | C | 0.222896 |
| 12 | 108618630 | -0.0475 | 0.0065 | 3.89E-13 | rs3764002 | T | C | 0.337603 |
| 12 | 118414926 | 0.063 | 0.0079 | 1.78E-15 | rs7132351 | A | G | 0.17439 |
| 12 | 4384844 | -0.4582 | 0.0303 | 8.22E-52 | rs76895963 | G | T | 0.023748 |
| 12 | 50263148 | 0.0394 | 0.0066 | 2.63E-09 | rs7132908 | A | G | 0.358104 |
| 12 | 97848910 | -0.0397 | 0.0065 | 7.24E-10 | rs6538804 | G | C | 0.433969 |
| 12 | 133088165 | 0.052 | 0.0081 | 1.17E-10 | rs3751297 | A | G | 0.241048 |
| 12 | 4271088 | -0.2373 | 0.0344 | 5.52E-12 | rs112108223 | A | G | 0.0147015 |
| 12 | 71478626 | -0.0499 | 0.0063 | 1.47E-15 | rs1707498 | A | C | 0.449132 |
| 12 | 121432117 | -0.0631 | 0.0093 | 1.41E-11 | rs56348580 | C | G | 0.301336 |
| 12 | 4365572 | -0.2052 | 0.0301 | 9.97E-12 | rs74862545 | T | C | 0.0223105 |
| 12 | 4521511 | -0.1272 | 0.0217 | 4.70E-09 | rs78470967 | A | T | 0.042318 |
| 12 | 24090004 | 0.0395 | 0.007 | 2.05E-08 | rs4517619 | G | T | 0.384609 |
| 12 | 66215214 | 0.0692 | 0.0077 | 2.96E-19 | rs2583938 | A | T | 0.185271 |
| 13 | 51095908 | -0.0413 | 0.0069 | 2.31E-09 | rs9562987 | A | G | 0.41532 |
| 13 | 80707429 | -0.0749 | 0.0069 | 3.91E-27 | rs1215468 | G | A | 0.287639 |
| 13 | 91950181 | -0.0615 | 0.0094 | 6.62E-11 | rs72640313 | A | G | 0.116012 |
| 13 | 33554302 | -0.0802 | 0.0091 | 1.72E-18 | rs576674 | A | G | 0.856359 |
| 13 | 26783757 | 0.0497 | 0.0087 | 1.37E-08 | rs192749 | A | T | 0.163087 |
| 14 | 101255172 | -0.0536 | 0.008 | 2.48E-11 | rs73347525 | G | A | 0.201505 |
| 14 | 103292959 | 0.037 | 0.0068 | 4.89E-08 | rs11846158 | G | A | 0.283548 |
| 14 | 38800704 | -0.0408 | 0.0067 | 1.09E-09 | rs4901812 | A | G | 0.333674 |
| 15 | 62396389 | -0.0604 | 0.0063 | 8.28E-22 | rs7172432 | G | A | 0.452818 |
| 15 | 93834743 | -0.0435 | 0.0074 | 4.50E-09 | rs12441261 | A | C | 0.248102 |
| 15 | 57610146 | 0.1366 | 0.0235 | 5.96E-09 | rs117430555 | T | G | 0.0336968 |
| 15 | 77782335 | 0.0696 | 0.0066 | 3.88E-26 | rs12910361 | G | A | 0.62609 |
| 15 | 40616742 | 0.0623 | 0.0082 | 3.84E-14 | rs3743140 | A | G | 0.152268 |
| 15 | 91523036 | 0.0582 | 0.0067 | 5.76E-18 | rs6496742 | T | C | 0.303172 |
| 15 | 38828140 | 0.0457 | 0.0068 | 1.84E-11 | rs8043085 | T | G | 0.301228 |
| 15 | 75595357 | 0.0428 | 0.0072 | 2.86E-09 | rs35917376 | A | T | 0.717917 |
| 15 | 52587740 | -0.1063 | 0.0148 | 7.97E-13 | rs149336329 | T | G | 0.0459427 |
| 16 | 20337884 | 0.0832 | 0.0152 | 4.76E-08 | rs4632135 | C | T | 0.0339896 |
| 16 | 12185129 | 0.2321 | 0.042 | 3.20E-08 | rs143708136 | T | C | 0.0116967 |
| 16 | 75246035 | -0.1168 | 0.0146 | 1.21E-15 | rs72802365 | C | G | 0.0619909 |
| 16 | 53806453 | 0.1166 | 0.0069 | 2.23E-64 | rs56094641 | G | A | 0.352899 |
| 17 | 36047417 | 0.0598 | 0.0072 | 1.34E-16 | rs3110641 | G | A | 0.76149 |
| 17 | 4032785 | 0.0581 | 0.0076 | 2.33E-14 | rs12453376 | G | A | 0.2041 |
| 17 | 29647358 | -0.0446 | 0.0076 | 3.63E-09 | rs3837848 | AT | A | 0.459309 |
| 17 | 36102381 | -0.091 | 0.0065 | 5.35E-44 | rs11651052 | G | A | 0.589657 |
| 17 | 65641651 | 0.0495 | 0.0088 | 1.96E-08 | rs2706710 | T | C | 0.161364 |
| 17 | 6945483 | 0.1337 | 0.0157 | 1.66E-17 | rs75418188 | T | C | 0.0276409 |
| 17 | 7614601 | -0.0357 | 0.0065 | 3.75E-08 | rs7141 | A | G | 0.6394 |
| 17 | 47060322 | -0.0584 | 0.0087 | 2.44E-11 | rs35895680 | A | C | 0.24391 |
| 18 | 57829135 | 0.0785 | 0.0076 | 4.88E-25 | rs6567160 | C | T | 0.218731 |
| 19 | 19393714 | 0.0552 | 0.0082 | 2.08E-11 | rs8100204 | A | G | 0.169058 |
| 19 | 33887405 | -0.0488 | 0.0065 | 5.17E-14 | rs7250869 | C | T | 0.628785 |
| 19 | 45411941 | -0.0739 | 0.0092 | 1.02E-15 | rs429358 | C | T | 0.14701 |
| 19 | 7241501 | 0.0559 | 0.0088 | 1.89E-10 | rs8100562 | T | C | 0.170998 |
| 19 | 18808915 | -0.0492 | 0.0074 | 3.89E-11 | rs7258722 | A | T | 0.543657 |
| 19 | 46157004 | -0.0675 | 0.0067 | 1.33E-23 | rs10408179 | C | T | 0.38792 |
| 19 | 7968168 | 0.0451 | 0.0065 | 4.70E-12 | rs2115107 | A | G | 0.372125 |
| 19 | 47602577 | 0.0545 | 0.0098 | 2.63E-08 | rs9304665 | A | T | 0.752917 |
| 20 | 57648366 | -0.2313 | 0.0279 | 1.25E-16 | rs140896965 | T | C | 0.0187073 |
| 20 | 42994812 | 0.0565 | 0.0076 | 1.05E-13 | rs12625671 | C | T | 0.203237 |
| 20 | 62447327 | -0.067 | 0.0118 | 1.31E-08 | rs28637955 | G | A | 0.373478 |
| 20 | 45598190 | -0.0819 | 0.0125 | 6.41E-11 | rs11471522 | TTTTG | T | 0.285059 |
| 22 | 30170655 | -0.1263 | 0.0217 | 6.02E-09 | rs142682088 | A | G | 0.0401343 |
| 22 | 50354255 | -0.0498 | 0.0077 | 1.21E-10 | rs28375915 | A | G | 0.476839 |

**Table S2. Identified SNPs in hemiplegia GWAS**

| SNP | chr | pos | beta.outcome | se.outcome | pval.outcome | eaf.outcome | effect_allele.outcome | other_allele.outcome |
| --- | --- | --- | --- | --- | --- | --- | --- | --- |
| rs9844972 | 3 | 150097635 | 0.0445 | 0.1122 | 0.691899 | 0.05432 | C | G |
| rs243018 | 2 | 60586707 | -0.0262 | 0.0513 | 0.6089 | 0.4361 | G | C |
| rs1861410 | 2 | 58933591 | -0.0688 | 0.0518 | 0.1843 | 0.5986 | T | C |
| rs62319060 | 4 | 96145415 | 0.0467 | 0.0512 | 0.361 | 0.4371 | C | T |
| rs35385487 | 4 | 1286339 | -0.0287 | 0.1181 | 0.8081 | 0.0489 | G | A |
| rs6878122 | 5 | 76427311 | 0.0586 | 0.0608 | 0.335 | 0.7723 | A | G |
| rs13073970 | 3 | 170630520 | -0.0011 | 0.0668 | 0.9874 | 0.1767 | T | G |
| rs7250869 | 19 | 33887405 | -0.1249 | 0.0541 | 0.0209002 | 0.6736 | C | T |
| rs12625671 | 20 | 42994812 | -0.0828 | 0.0724 | 0.253 | 0.1439 | C | T |
| rs17496664 | 6 | 76199697 | -0.0278 | 0.0559 | 0.618899 | 0.2973 | T | C |
| rs1776899 | 6 | 34193230 | 0.0415 | 0.182 | 0.8197 | 0.9798 | A | G |
| rs146733600 | 6 | 32573760 | 0.0248 | 0.2414 | 0.9182 | 0.01213 | T | C |
| rs115018313 | 6 | 32710407 | -0.1717 | 0.1151 | 0.1356 | 0.05244 | C | T |
| rs75872811 | 10 | 63732315 | -0.1289 | 0.0819 | 0.1156 | 0.1073 | G | A |
| rs34872471 | 10 | 114754071 | 0.124 | 0.0635 | 0.0506198 | 0.2015 | C | T |
| rs11001398 | 10 | 77221514 | -0.0183 | 0.0515 | 0.7217 | 0.5654 | C | G |
| rs140896965 | 20 | 57648366 | 0.0214 | 0.1158 | 0.8535 | 0.04997 | T | C |
| rs1002389 | 7 | 156968323 | -0.0899 | 0.0546 | 0.0998504 | 0.3156 | G | C |
| rs4731701 | 7 | 130430930 | 0.0371 | 0.0509 | 0.4667 | 0.4641 | T | C |
| rs2270162 | 7 | 69061966 | 0.0397 | 0.1095 | 0.716699 | 0.05742 | G | C |
| rs7030811 | 9 | 22288140 | 0.0878 | 0.1704 | 0.6065 | 0.02245 | A | T |
| rs56094641 | 16 | 53806453 | -0.0016 | 0.0514 | 0.9745 | 0.4191 | G | A |
| rs11257655 | 10 | 12307894 | 0.0307 | 0.058 | 0.595899 | 0.2649 | T | C |
| rs2815625 | 10 | 12598322 | -0.007 | 0.0515 | 0.8922 | 0.4236 | A | C |
| rs2796441 | 9 | 84308948 | 0.0492 | 0.0515 | 0.3388 | 0.4175 | A | G |
| rs7741521 | 6 | 31442748 | 0.0442 | 0.1167 | 0.704901 | 0.04891 | A | G |
| rs72951548 | 6 | 118050841 | -0.1327 | 0.0632 | 0.0356197 | 0.2022 | T | C |
| rs12441261 | 15 | 93834743 | 0.0613 | 0.0707 | 0.3859 | 0.1525 | A | C |
| rs75418188 | 17 | 6945483 | 0.1931 | 0.1924 | 0.3154 | 0.01696 | T | C |
| rs6538804 | 12 | 97848910 | -0.0863 | 0.0532 | 0.1049 | 0.3552 | G | C |
| rs11819995 | 11 | 128389391 | 0.0743 | 0.0696 | 0.2853 | 0.1582 | T | C |
| rs7132908 | 12 | 50263148 | 0.0476 | 0.0525 | 0.3647 | 0.3836 | A | G |
| rs4901812 | 14 | 38800704 | -0.0179 | 0.0568 | 0.752501 | 0.2775 | A | G |
| rs576674 | 13 | 33554302 | 0.0893 | 0.0885 | 0.3129 | 0.906 | A | G |
| rs77464186 | 11 | 72460398 | -0.1311 | 0.0597 | 0.0281099 | 0.2376 | C | A |
| rs35895680 | 17 | 47060322 | -0.1059 | 0.0554 | 0.0559204 | 0.3089 | A | C |
| rs860262 | 7 | 28194397 | -0.0053 | 0.0509 | 0.9165 | 0.4882 | A | C |
| rs139722172 | 7 | 102410477 | -0.0491 | 0.0656 | 0.4543 | 0.1877 | G | C |
| rs39254 | 7 | 89765708 | 0.0218 | 0.0515 | 0.6728 | 0.5731 | T | G |
| rs7778167 | 7 | 127851628 | -0.088 | 0.0616 | 0.1526 | 0.2222 | A | G |
| rs406767 | 1 | 120554048 | 0.0923 | 0.074 | 0.2125 | 0.1363 | C | T |
| rs633715 | 1 | 177852580 | -0.0462 | 0.0608 | 0.4474 | 0.226 | C | T |
| rs348330 | 1 | 229672955 | 0.0196 | 0.0534 | 0.7134 | 0.6444 | A | G |
| rs1260326 | 2 | 27730940 | -0.0315 | 0.0534 | 0.555199 | 0.6493 | C | T |
| rs71424153 | 2 | 65280894 | 0.0677 | 0.0608 | 0.2653 | 0.228 | C | G |
| rs13266634 | 8 | 118184783 | -0.101 | 0.0524 | 0.0541801 | 0.3765 | T | C |
| rs12763565 | 10 | 94520143 | 0.0778 | 0.0658 | 0.2372 | 0.1821 | G | T |
| rs17101591 | 10 | 122947203 | -0.168 | 0.1629 | 0.3023 | 0.02542 | T | C |
| rs10268294 | 7 | 1873406 | 0.0291 | 0.0567 | 0.6077 | 0.7241 | A | C |
| rs2578011 | 3 | 64004819 | -0.0565 | 0.0607 | 0.3517 | 0.2283 | T | C |
| rs62405419 | 6 | 50787459 | -0.0073 | 0.0874 | 0.933 | 0.09363 | T | G |
| rs10062657 | 5 | 95867908 | 0.1121 | 0.0613 | 0.0674808 | 0.7783 | A | C |
| rs116947250 | 5 | 49673818 | 0.2178 | 0.2545 | 0.3922 | 0.009828 | A | T |
| rs72964564 | 3 | 123054770 | -0.0829 | 0.067 | 0.216 | 0.1758 | C | A |
| rs56218782 | 4 | 140893287 | 0.0377 | 0.0536 | 0.4811 | 0.3406 | C | T |
| rs6438138 | 3 | 113026691 | -0.047 | 0.0542 | 0.3855 | 0.3247 | T | A |
| rs9873519 | 3 | 124921457 | 0.0413 | 0.0517 | 0.4244 | 0.583 | T | C |
| rs10938398 | 4 | 45186139 | 0.0686 | 0.0509 | 0.178 | 0.4731 | A | G |
| rs117430555 | 15 | 57610146 | -0.0709 | 0.1344 | 0.598 | 0.03832 | T | G |
| rs143708136 | 16 | 12185129 | -0.2513 | 0.3017 | 0.405 | 0.007543 | T | C |
| rs3743140 | 15 | 40616742 | -0.0164 | 0.0793 | 0.8361 | 0.1181 | A | G |
| rs3764002 | 12 | 108618630 | -0.0787 | 0.0535 | 0.1414 | 0.3435 | T | C |
| rs12453376 | 17 | 4032785 | 0.0326 | 0.0644 | 0.6124 | 0.1917 | G | A |
| rs8100562 | 19 | 7241501 | -0.101 | 0.0708 | 0.1536 | 0.152 | T | C |
| rs2583938 | 12 | 66215214 | -0.0612 | 0.0794 | 0.4403 | 0.1168 | A | T |
| rs11651052 | 17 | 36102381 | -0.0447 | 0.0534 | 0.4031 | 0.6479 | G | A |
| rs4632135 | 16 | 20337884 | -0.5657 | 0.2603 | 0.0297297 | 0.009608 | C | T |
| rs8100204 | 19 | 19393714 | 0.0046 | 0.0699 | 0.9478 | 0.1599 | A | G |
| rs543159 | 6 | 160776017 | -0.0471 | 0.0509 | 0.3544 | 0.4963 | A | C |
| rs12001437 | 9 | 34074476 | -0.069 | 0.0532 | 0.1944 | 0.3538 | C | T |
| rs1574285 | 9 | 4283137 | 0.0399 | 0.0511 | 0.435 | 0.5594 | T | G |
| rs10201401 | 2 | 44810480 | 0.0148 | 0.0686 | 0.8294 | 0.8354 | A | G |
| rs11680058 | 2 | 16574669 | -0.1312 | 0.0871 | 0.1318 | 0.8983 | A | G |
| rs10900325 | 1 | 146692174 | -0.0535 | 0.0695 | 0.4409 | 0.843 | C | T |
| rs1515104 | 2 | 227092405 | 0.0793 | 0.0528 | 0.1331 | 0.6391 | A | T |
| rs6853272 | 4 | 71735967 | -0.125 | 0.1616 | 0.4392 | 0.9742 | T | C |
| rs12108088 | 3 | 64722045 | 0.0454 | 0.0552 | 0.4113 | 0.3036 | A | G |
| rs35352848 | 3 | 23455582 | 0.0092 | 0.0548 | 0.8668 | 0.3117 | C | T |
| rs13086642 | 3 | 187705040 | 0.0602 | 0.0874 | 0.490601 | 0.09152 | A | G |
| rs9562987 | 13 | 51095908 | 0.0075 | 0.059 | 0.8982 | 0.2493 | A | G |
| rs9304665 | 19 | 47602577 | 0.0136 | 0.0566 | 0.8107 | 0.72 | A | T |
| rs10408179 | 19 | 46157004 | 0.0457 | 0.0512 | 0.3724 | 0.4465 | C | T |
| rs6885132 | 5 | 14768092 | -0.1331 | 0.0795 | 0.0941391 | 0.1172 | G | C |
| rs13292347 | 9 | 81908202 | -0.0072 | 0.0778 | 0.9262 | 0.1206 | C | T |
| rs9368222 | 6 | 20686996 | -0.0378 | 0.0539 | 0.4833 | 0.3291 | A | C |
| rs9265433 | 6 | 31296247 | 0.025 | 0.052 | 0.6311 | 0.5696 | C | T |
| rs13162708 | 5 | 87943345 | -0.0934 | 0.082 | 0.2547 | 0.108 | T | C |
| rs1966265 | 5 | 176516631 | 0.0141 | 0.0612 | 0.8178 | 0.22 | A | G |
| rs12662968 | 6 | 137288760 | -0.0155 | 0.0509 | 0.7601 | 0.5058 | T | A |
| rs76895963 | 12 | 4384844 | -0.0555 | 0.1526 | 0.716199 | 0.03114 | G | T |
| rs12578595 | 12 | 27964996 | 0.0414 | 0.0671 | 0.5378 | 0.1736 | T | C |
| rs1707498 | 12 | 71478626 | 2.00E-04 | 0.0512 | 0.9963 | 0.4337 | A | C |
| rs4517619 | 12 | 24090004 | 0.0408 | 0.0576 | 0.4793 | 0.267 | G | T |
| rs1117610 | 7 | 150541189 | -0.0206 | 0.064 | 0.7472 | 0.1992 | T | A |
| rs10830963 | 11 | 92708710 | 0.0823 | 0.0531 | 0.1214 | 0.3567 | G | C |
| rs2237897 | 11 | 2858546 | -0.0794 | 0.0926 | 0.3911 | 0.08138 | T | C |
| rs114322470 | 10 | 114736670 | -0.1897 | 0.1673 | 0.2568 | 0.02354 | G | T |
| rs4930045 | 11 | 2196424 | -0.0156 | 0.0537 | 0.7715 | 0.6556 | C | T |
| rs12698897 | 7 | 69783013 | -0.009 | 0.0582 | 0.8766 | 0.2587 | A | T |
| rs7172432 | 15 | 62396389 | -0.0088 | 0.0512 | 0.8642 | 0.5533 | G | A |
| rs7132351 | 12 | 118414926 | 0.0278 | 0.066 | 0.673701 | 0.1807 | A | G |
| rs1127215 | 1 | 117532790 | -0.0577 | 0.0533 | 0.2792 | 0.3494 | T | C |
| rs11802899 | 1 | 22112174 | 0.0476 | 0.0723 | 0.5101 | 0.8561 | A | C |
| rs141330165 | 4 | 85299808 | -0.0358 | 0.0993 | 0.7183 | 0.06941 | T | C |
| rs10169613 | 2 | 111934977 | -0.0104 | 0.0512 | 0.8389 | 0.4468 | T | C |
| rs17036160 | 3 | 12329783 | 0.0421 | 0.0676 | 0.533801 | 0.1713 | T | C |
| rs1046316 | 4 | 6304087 | 0.0249 | 0.0523 | 0.6338 | 0.6118 | G | A |
| rs12692723 | 2 | 165437736 | -0.055 | 0.0586 | 0.3478 | 0.2609 | G | C |
| rs73221113 | 4 | 718868 | 0.0466 | 0.1153 | 0.6859 | 0.05145 | A | G |
| rs73347525 | 14 | 101255172 | -0.0349 | 0.062 | 0.5729 | 0.2216 | G | A |
| rs11846158 | 14 | 103292959 | 0.0471 | 0.0573 | 0.4112 | 0.2699 | G | A |
| rs4273712 | 6 | 126964510 | 0.0261 | 0.0572 | 0.647301 | 0.2688 | G | A |
| rs72802365 | 16 | 75246035 | -0.0567 | 0.0943 | 0.5479 | 0.0799 | C | G |
| rs56348580 | 12 | 121432117 | -0.0906 | 0.057 | 0.1117 | 0.2827 | C | G |
| rs74862545 | 12 | 4365572 | -0.0865 | 0.1882 | 0.6457 | 0.01952 | T | C |
| rs1567353 | 9 | 1033773 | 0.0517 | 0.0536 | 0.335 | 0.3353 | G | C |
| rs10965250 | 9 | 22133284 | 0.087 | 0.0726 | 0.2306 | 0.1432 | A | G |
| rs1215468 | 13 | 80707429 | 0.059 | 0.0556 | 0.2888 | 0.2972 | G | A |
| rs6567160 | 18 | 57829135 | -0.0755 | 0.0659 | 0.2513 | 0.1841 | C | T |
| rs3110641 | 17 | 36047417 | -0.1079 | 0.0625 | 0.0843199 | 0.7867 | G | A |
| rs78470967 | 12 | 4521511 | -0.0437 | 0.1315 | 0.7395 | 0.03939 | A | T |
| rs7141 | 17 | 7614601 | 0.0138 | 0.0548 | 0.8008 | 0.6806 | A | G |
| rs2706710 | 17 | 65641651 | 0.1932 | 0.069 | 0.00512802 | 0.1622 | T | C |
| rs8043085 | 15 | 38828140 | 0.088 | 0.0605 | 0.1455 | 0.2303 | T | G |
| rs2648731 | 5 | 52072194 | 0.0249 | 0.0647 | 0.7001 | 0.19 | A | G |
| rs392794 | 5 | 55808342 | -0.0404 | 0.0544 | 0.4582 | 0.6828 | T | C |
| rs17168486 | 7 | 14898282 | 0.009 | 0.0637 | 0.8883 | 0.1981 | T | C |
| rs11514706 | 7 | 15059272 | -0.0022 | 0.0519 | 0.9667 | 0.4075 | C | A |
| rs703981 | 10 | 80942855 | 0.0371 | 0.0507 | 0.4642 | 0.4789 | C | G |
| rs9379084 | 6 | 7231843 | 0.0574 | 0.0811 | 0.4789 | 0.1139 | A | G |
| rs6453133 | 5 | 74692776 | 3.00E-04 | 0.0537 | 0.9959 | 0.3355 | G | A |
| rs3887925 | 3 | 186665645 | -0.069 | 0.0511 | 0.1775 | 0.463 | T | C |
| rs2010825 | 7 | 44188220 | -0.0331 | 0.0511 | 0.517201 | 0.4979 | C | T |
| rs58090211 | 11 | 35433712 | 0.1663 | 0.2051 | 0.4175 | 0.01534 | A | C |
| rs554833 | 9 | 136147160 | 0.0327 | 0.0512 | 0.5221 | 0.4354 | T | C |
| rs28642213 | 9 | 139248082 | -0.0125 | 0.0554 | 0.8216 | 0.6974 | G | A |
| rs11607147 | 11 | 65346178 | 0.0233 | 0.0623 | 0.708699 | 0.7828 | C | T |
| rs76177300 | 5 | 102143311 | -0.0831 | 0.1092 | 0.4466 | 0.05784 | A | G |
| rs4711750 | 6 | 43757082 | 0.0411 | 0.0512 | 0.422 | 0.4979 | A | T |
| rs6985028 | 8 | 30822094 | 0.0815 | 0.0526 | 0.1218 | 0.6205 | A | G |
| rs35473599 | 7 | 74088893 | 0.0172 | 0.0631 | 0.785199 | 0.2051 | A | G |
| rs112108223 | 12 | 4271088 | 1.00E-04 | 0.1724 | 0.9995 | 0.02234 | A | G |
| rs1794138 | 11 | 49910841 | -0.1465 | 0.1017 | 0.1497 | 0.497 | G | T |
| rs5215 | 11 | 17408630 | -0.0253 | 0.0509 | 0.6183 | 0.5283 | T | C |
| rs62508166 | 8 | 41537318 | 0.048 | 0.0657 | 0.465 | 0.1851 | A | G |
| rs1362891 | 8 | 41666299 | 0.09 | 0.0908 | 0.3212 | 0.08498 | A | G |
| rs12546365 | 8 | 95911477 | -0.0688 | 0.0508 | 0.1754 | 0.5135 | C | T |
| rs1977832 | 10 | 94463779 | -0.0928 | 0.0508 | 0.0677798 | 0.4765 | T | G |
| rs6919504 | 6 | 156976650 | -0.0802 | 0.1736 | 0.6441 | 0.02209 | G | A |
| rs972119 | 6 | 143170972 | 0.0397 | 0.0583 | 0.4961 | 0.2525 | G | A |
| rs4854343 | 2 | 638107 | -0.126 | 0.0691 | 0.0683502 | 0.8374 | A | G |
| rs340874 | 1 | 214159256 | -0.047 | 0.0515 | 0.3618 | 0.4316 | C | T |
| rs1128249 | 2 | 165528624 | -0.0732 | 0.0535 | 0.171 | 0.3478 | T | G |
| rs4358140 | 2 | 196663615 | 0.001 | 0.0519 | 0.9846 | 0.6043 | G | C |
| rs2034761 | 2 | 234364426 | 0.0503 | 0.0532 | 0.344 | 0.3555 | G | T |
| rs755249 | 1 | 39995074 | 0.0173 | 0.0606 | 0.7751 | 0.2259 | T | C |
| rs62262091 | 3 | 47693664 | 0.0105 | 0.0844 | 0.9006 | 0.1007 | T | C |
| rs6813195 | 4 | 153520475 | 4.00E-04 | 0.054 | 0.9946 | 0.3327 | T | C |
| rs6554060 | 4 | 52776901 | 0.0267 | 0.0559 | 0.6324 | 0.2917 | G | A |
| rs72640313 | 13 | 91950181 | -0.0384 | 0.0972 | 0.6925 | 0.07473 | A | G |
| rs10950494 | 7 | 13892902 | 0.0416 | 0.0509 | 0.4144 | 0.494 | A | G |
| rs10173251 | 2 | 43529508 | 0.0047 | 0.1026 | 0.9636 | 0.06721 | G | C |
| rs35917376 | 15 | 75595357 | 0.0765 | 0.0679 | 0.26 | 0.8274 | A | T |
| rs12910361 | 15 | 77782335 | 0.0293 | 0.0545 | 0.5909 | 0.6764 | G | A |
| rs7258722 | 19 | 18808915 | -0.0684 | 0.051 | 0.1797 | 0.4577 | A | T |
| rs429358 | 19 | 45411941 | -0.1135 | 0.0663 | 0.0867501 | 0.1827 | C | T |
| rs2115107 | 19 | 7968168 | -0.0706 | 0.0529 | 0.1817 | 0.3678 | A | G |
| rs6496742 | 15 | 91523036 | -0.0283 | 0.0583 | 0.6277 | 0.2535 | T | C |
| rs149336329 | 15 | 52587740 | 0.0358 | 0.1647 | 0.8281 | 0.02466 | T | G |
| rs3918296 | 11 | 69459036 | -0.7333 | 0.3678 | 0.0461998 | 0.005133 | G | C |
| rs3751297 | 12 | 133088165 | 0.0133 | 0.0569 | 0.8146 | 0.2891 | A | G |
| rs142682088 | 22 | 30170655 | 0.0442 | 0.1268 | 0.727301 | 0.04148 | A | G |
| rs72906810 | 1 | 51463424 | 0.0708 | 0.1107 | 0.5229 | 0.05712 | G | A |
| rs2382249 | 2 | 149529095 | -0.0874 | 0.0666 | 0.1896 | 0.1765 | G | A |
| rs72830608 | 6 | 20525488 | 0.097 | 0.059 | 0.1002 | 0.2487 | T | G |
| rs113082607 | 10 | 12404298 | 0.4011 | 0.3762 | 0.2864 | 0.004443 | C | A |
| rs28637955 | 20 | 62459171 | -0.0845 | 0.0538 | 0.1164 | 0.3441 | G | A |
| rs28375915 | 22 | 50419266 | 0.0516 | 0.0513 | 0.3143 | 0.4456 | A | G |

**Table S3. The effect of each SNP on hemiplegia**

| SNP | b | se | p |
| --- | --- | --- | --- |
| rs1002389 | 1.759295499 | 1.068493151 | 0.099656716 |
| rs10062657 | -2.6882494 | 1.470023981 | 0.067442875 |
| rs10169613 | 0.269430052 | 1.32642487 | 0.839037332 |
| rs10173251 | -0.044256121 | 0.966101695 | 0.963462512 |
| rs10201401 | 0.351543943 | 1.629453682 | 0.829187738 |
| rs10268294 | 0.640969163 | 1.248898678 | 0.607792182 |
| rs10408179 | -0.677037037 | 0.758518519 | 0.372083138 |
| rs1046316 | 0.249249249 | 0.523523524 | 0.634003546 |
| rs10830963 | 1.632936508 | 1.053571429 | 0.121164118 |
| rs10900325 | 0.960502693 | 1.247755835 | 0.44142793 |
| rs10938398 | 1.397148676 | 1.036659878 | 0.177741807 |
| rs10950494 | 1.152354571 | 1.409972299 | 0.413763405 |
| rs10965250 | -0.52919708 | 0.441605839 | 0.230781915 |
| rs1117610 | -0.492822967 | 1.531100478 | 0.747547393 |
| rs112108223 | -0.000421408 | 0.726506532 | 0.99953719 |
| rs11257655 | 0.283210332 | 0.535055351 | 0.596590181 |
| rs1127215 | 1.373809524 | 1.269047619 | 0.279007503 |
| rs1128249 | 0.93129771 | 0.680661578 | 0.171241878 |
| rs113082607 | 4.481564246 | 4.203351955 | 0.286338576 |
| rs114322470 | 0.831652784 | 0.733450241 | 0.256840183 |
| rs115018313 | -0.604577465 | 0.40528169 | 0.135765664 |
| rs11514706 | -0.036605657 | 0.863560732 | 0.96618843 |
| rs11607147 | -0.566909976 | 1.515815085 | 0.708406705 |
| rs11651052 | 0.491208791 | 0.586813187 | 0.402548359 |
| rs11680058 | -2.072669826 | 1.375987362 | 0.131986437 |
| rs116947250 | 2.565371025 | 2.997644287 | 0.392110806 |
| rs117430555 | -0.519033675 | 0.983894583 | 0.597825754 |
| rs11802899 | -0.957746479 | 1.45472837 | 0.510301749 |
| rs11819995 | 1.507099391 | 1.411764706 | 0.285733145 |
| rs11846158 | 1.272972973 | 1.548648649 | 0.411082856 |
| rs12001437 | -1.880108992 | 1.449591281 | 0.194633774 |
| rs12108088 | -1.243835616 | 1.512328767 | 0.410812999 |
| rs1215468 | -0.787716956 | 0.742323097 | 0.288621248 |
| rs12441261 | -1.409195402 | 1.625287356 | 0.385917986 |
| rs12453376 | 0.561101549 | 1.108433735 | 0.612708407 |
| rs12546365 | 1.805774278 | 1.333333333 | 0.175630893 |
| rs12578595 | -0.579020979 | 0.938461538 | 0.537241607 |
| rs1260326 | -0.443661972 | 0.752112676 | 0.555265981 |
| rs12625671 | -1.465486726 | 1.281415929 | 0.252770307 |
| rs12692723 | -1.26146789 | 1.344036697 | 0.347953332 |
| rs12698897 | -0.153583618 | 0.993174061 | 0.877105784 |
| rs12763565 | 1.246794872 | 1.054487179 | 0.237058596 |
| rs12910361 | 0.420977011 | 0.783045977 | 0.590843094 |
| rs13073970 | 0.022044088 | 1.338677355 | 0.986861776 |
| rs13086642 | -1.005008347 | 1.459098497 | 0.490957201 |
| rs13162708 | -1.710622711 | 1.501831502 | 0.254692981 |
| rs13266634 | 0.959164292 | 0.497625831 | 0.053919724 |
| rs13292347 | 0.099037139 | 1.070151307 | 0.92626505 |
| rs1362891 | -1.096224117 | 1.105968331 | 0.321593092 |
| rs139722172 | 0.624681934 | 0.834605598 | 0.454173331 |
| rs140896965 | -0.092520536 | 0.500648508 | 0.853384824 |
| rs141330165 | 0.297836938 | 0.826123128 | 0.718455562 |
| rs142682088 | -0.349960412 | 1.003958828 | 0.727404313 |
| rs143708136 | -1.082722964 | 1.299870745 | 0.404874826 |
| rs146733600 | 0.125633232 | 1.22289767 | 0.918174048 |
| rs149336329 | -0.33678269 | 1.549388523 | 0.827923978 |
| rs1515104 | 1.051724138 | 0.700265252 | 0.133124502 |
| rs1567353 | 1.282878412 | 1.330024814 | 0.334769131 |
| rs1574285 | -0.613846154 | 0.786153846 | 0.434907241 |
| rs17036160 | -0.385531136 | 0.619047619 | 0.533428403 |
| rs1707498 | -0.004008016 | 1.026052104 | 0.996883271 |
| rs17101591 | 2.459736457 | 2.385065886 | 0.302396619 |
| rs17168486 | 0.143769968 | 1.017571885 | 0.887642995 |
| rs17496664 | 0.594017094 | 1.194444444 | 0.618965782 |
| rs1776899 | 0.461624027 | 2.024471635 | 0.819629155 |
| rs1794138 | 3.262806236 | 2.265033408 | 0.149722793 |
| rs1861410 | 1.849462366 | 1.392473118 | 0.18411689 |
| rs1966265 | -0.303225806 | 1.316129032 | 0.817787055 |
| rs1977832 | 0.830053667 | 0.454382826 | 0.06773411 |
| rs2010825 | -0.805352798 | 1.243309002 | 0.517146976 |
| rs2034761 | -1.341333333 | 1.418666667 | 0.344409426 |
| rs2115107 | -1.5654102 | 1.172949002 | 0.182009403 |
| rs2237897 | 0.296489918 | 0.345780433 | 0.391195461 |
| rs2270162 | 0.581259151 | 1.603221083 | 0.716935779 |
| rs2382249 | 1.879569892 | 1.432258065 | 0.18941478 |
| rs2578011 | 0.815295815 | 0.875901876 | 0.351953279 |
| rs2583938 | -0.884393064 | 1.147398844 | 0.440836836 |
| rs2648731 | 0.384853168 | 1 | 0.700346205 |
| rs2706710 | 3.903030303 | 1.393939394 | 0.005110261 |
| rs2796441 | -0.724594993 | 0.758468336 | 0.339405884 |
| rs2815625 | -0.201149425 | 1.479885057 | 0.891882682 |
| rs28375915 | -1.036144578 | 1.030120482 | 0.314488716 |
| rs28637955 | 1.26119403 | 0.802985075 | 0.116268159 |
| rs28642213 | -0.124254473 | 0.550695825 | 0.82148783 |
| rs3110641 | -1.804347826 | 1.045150502 | 0.084275476 |
| rs340874 | -0.878504673 | 0.962616822 | 0.361441717 |
| rs348330 | -0.363636364 | 0.990723562 | 0.713588287 |
| rs34872471 | 0.417227456 | 0.213660834 | 0.050848526 |
| rs35352848 | -0.104426788 | 0.622020431 | 0.866675158 |
| rs35385487 | 0.377631579 | 1.553947368 | 0.807994246 |
| rs35473599 | 0.311030741 | 1.141048825 | 0.785173627 |
| rs35895680 | 1.813356164 | 0.948630137 | 0.055933637 |
| rs35917376 | 1.787383178 | 1.586448598 | 0.259887594 |
| rs3743140 | -0.263242376 | 1.272873194 | 0.836158571 |
| rs3751297 | 0.255769231 | 1.094230769 | 0.815184185 |
| rs3764002 | 1.656842105 | 1.126315789 | 0.141283535 |
| rs3887925 | -1.301886792 | 0.964150943 | 0.176921843 |
| rs3918296 | 4.128941441 | 2.070945946 | 0.046179754 |
| rs39254 | 0.543640898 | 1.284289277 | 0.672075686 |
| rs392794 | -0.673333333 | 0.906666667 | 0.45769539 |
| rs406767 | 1.120145631 | 0.898058252 | 0.212288508 |
| rs4273712 | 0.452339688 | 0.991334489 | 0.648178789 |
| rs429358 | 1.535859269 | 0.897158322 | 0.086912235 |
| rs4517619 | 1.032911392 | 1.458227848 | 0.478738282 |
| rs4632135 | -6.799278846 | 3.128605769 | 0.029760632 |
| rs4731701 | -0.766528926 | 1.051652893 | 0.466074974 |
| rs4854343 | -1.831395349 | 1.004360465 | 0.068236128 |
| rs4901812 | 0.43872549 | 1.392156863 | 0.752654717 |
| rs4930045 | 0.220963173 | 0.760623229 | 0.771431614 |
| rs5215 | 0.406099518 | 0.817014446 | 0.619151645 |
| rs543159 | 1.293956044 | 1.398351648 | 0.354787096 |
| rs554833 | 0.738148984 | 1.155756208 | 0.523036413 |
| rs56094641 | -0.013722127 | 0.440823328 | 0.975167137 |
| rs56218782 | -0.966666667 | 1.374358974 | 0.481832544 |
| rs56348580 | 1.435816165 | 0.903328051 | 0.111953491 |
| rs576674 | -1.113466334 | 1.103491272 | 0.312955668 |
| rs58090211 | -2.060718711 | 2.541511772 | 0.417466757 |
| rs62262091 | 0.119863014 | 0.96347032 | 0.90099257 |
| rs62319060 | 1.258760108 | 1.380053908 | 0.361711144 |
| rs62405419 | -0.12920354 | 1.546902655 | 0.933434873 |
| rs62508166 | -0.47151277 | 0.645383104 | 0.465027418 |
| rs633715 | -0.940936864 | 1.238289206 | 0.447333239 |
| rs6438138 | -1.146341463 | 1.32195122 | 0.385855077 |
| rs6453133 | -0.006849315 | 1.226027397 | 0.995542568 |
| rs6496742 | -0.486254296 | 1.001718213 | 0.627378278 |
| rs6554060 | 0.729508197 | 1.527322404 | 0.632907424 |
| rs6567160 | -0.961783439 | 0.839490446 | 0.251929542 |
| rs6813195 | -0.006451613 | 0.870967742 | 0.994089798 |
| rs6853272 | 1.740947075 | 2.250696379 | 0.439217743 |
| rs6878122 | -1.071297989 | 1.111517367 | 0.335138289 |
| rs6885132 | 2.964365256 | 1.770601336 | 0.094088581 |
| rs6919504 | -1.2832 | 2.7776 | 0.644094539 |
| rs6985028 | -1.99754902 | 1.289215686 | 0.121278469 |
| rs7030811 | -0.930084746 | 1.805084746 | 0.606372593 |
| rs7132351 | 0.441269841 | 1.047619048 | 0.673600194 |
| rs7132908 | 1.208121827 | 1.33248731 | 0.364583096 |
| rs7141 | -0.386554622 | 1.535014006 | 0.801176474 |
| rs71424153 | -1.578088578 | 1.417249417 | 0.265499396 |
| rs7172432 | 0.145695364 | 0.847682119 | 0.863535801 |
| rs7250869 | 2.55942623 | 1.108606557 | 0.020960922 |
| rs72640313 | 0.624390244 | 1.580487805 | 0.692797333 |
| rs72802365 | 0.485445205 | 0.807363014 | 0.54765848 |
| rs72830608 | 2.012448133 | 1.22406639 | 0.100162199 |
| rs72906810 | -0.808219178 | 1.26369863 | 0.522454535 |
| rs72951548 | 2.116427432 | 1.007974482 | 0.035756688 |
| rs72964564 | 0.825697211 | 0.667330677 | 0.215970743 |
| rs73221113 | 0.499464094 | 1.235798499 | 0.686092821 |
| rs73347525 | 0.651119403 | 1.156716418 | 0.573500783 |
| rs74862545 | 0.421539961 | 0.917153996 | 0.645790847 |
| rs75418188 | 1.444278235 | 1.439042633 | 0.315553009 |
| rs755249 | 0.280388979 | 0.982171799 | 0.775277537 |
| rs75872811 | 1.77303989 | 1.126547455 | 0.115517374 |
| rs76177300 | -0.634835752 | 0.834224599 | 0.446663631 |
| rs76895963 | 0.121126146 | 0.33304234 | 0.716085078 |
| rs7741521 | -0.715210356 | 1.888349515 | 0.704874315 |
| rs77464186 | 1.275291829 | 0.5807393 | 0.028093382 |
| rs7778167 | -1.541155867 | 1.078809107 | 0.153127451 |
| rs78470967 | 0.343553459 | 1.033805031 | 0.739648099 |
| rs8043085 | 1.925601751 | 1.323851204 | 0.145795141 |
| rs8100204 | 0.083333333 | 1.266304348 | 0.94753045 |
| rs8100562 | -1.806797853 | 1.266547406 | 0.153708586 |
| rs860262 | 0.079341317 | 0.761976048 | 0.917069567 |
| rs9265433 | 0.4 | 0.832 | 0.630680521 |
| rs9304665 | 0.249541284 | 1.03853211 | 0.810111117 |
| rs9368222 | -0.243713733 | 0.34751773 | 0.483116624 |
| rs9379084 | -0.703431373 | 0.993872549 | 0.479089225 |
| rs9562987 | -0.181598063 | 1.428571429 | 0.898846495 |
| rs972119 | -0.853763441 | 1.253763441 | 0.495896454 |
| rs9844972 | 0.42953668 | 1.083011583 | 0.691652724 |
| rs9873519 | 1.107238606 | 1.386058981 | 0.424383507 |
| All - Inverse variance weighted | 0.155400487 | 0.066554211 | 0.019546243 |
| All - MR Egger | 0.131124809 | 0.132449183 | 0.323597405 |

**Table S4. The results of leave-one-out analysis**

| SNP | b | se | p |
| --- | --- | --- | --- |
| rs1002389 | 0.149153483 | 0.066683696 | 0.025303933 |
| rs10062657 | 0.161241248 | 0.066622526 | 0.015511069 |
| rs10169613 | 0.155112682 | 0.066638148 | 0.019928784 |
| rs10173251 | 0.156352526 | 0.0667127 | 0.019095079 |
| rs10201401 | 0.155072719 | 0.066609796 | 0.019908027 |
| rs10268294 | 0.154017613 | 0.066648915 | 0.02083951 |
| rs10408179 | 0.161858914 | 0.066811891 | 0.015409613 |
| rs1046316 | 0.153858845 | 0.067098623 | 0.021846544 |
| rs10830963 | 0.149480814 | 0.066687401 | 0.02499273 |
| rs10900325 | 0.153103385 | 0.066649089 | 0.021609846 |
| rs10938398 | 0.150261165 | 0.066691795 | 0.024254847 |
| rs10950494 | 0.153174237 | 0.066628479 | 0.02150889 |
| rs10965250 | 0.17131139 | 0.06732317 | 0.010939902 |
| rs1117610 | 0.156627614 | 0.066617177 | 0.018715005 |
| rs112108223 | 0.156719231 | 0.066835247 | 0.019034275 |
| rs11257655 | 0.153391903 | 0.067075136 | 0.022203597 |
| rs1127215 | 0.152040137 | 0.066645925 | 0.022530002 |
| rs1128249 | 0.147910778 | 0.066874662 | 0.026983175 |
| rs113082607 | 0.154315632 | 0.066562555 | 0.020430036 |
| rs114322470 | 0.14978601 | 0.066829918 | 0.025006537 |
| rs115018313 | 0.176463022 | 0.067470172 | 0.008911708 |
| rs11514706 | 0.156547762 | 0.066752752 | 0.019017481 |
| rs11607147 | 0.156795635 | 0.066618455 | 0.018590774 |
| rs11651052 | 0.151024606 | 0.066986438 | 0.024161276 |
| rs11680058 | 0.16062527 | 0.066632199 | 0.015925197 |
| rs116947250 | 0.154211939 | 0.06657062 | 0.020530086 |
| rs117430555 | 0.158500655 | 0.066707 | 0.017498034 |
| rs11802899 | 0.157735287 | 0.066623972 | 0.017906517 |
| rs11819995 | 0.152389751 | 0.06662829 | 0.022186319 |
| rs11846158 | 0.153332614 | 0.066615756 | 0.021349446 |
| rs12001437 | 0.159700299 | 0.066624468 | 0.016528943 |
| rs12108088 | 0.158115622 | 0.066618752 | 0.017623247 |
| rs1215468 | 0.163042996 | 0.066823326 | 0.014690864 |
| rs12441261 | 0.158028465 | 0.066610081 | 0.017671002 |
| rs12453376 | 0.153932553 | 0.066674507 | 0.020959303 |
| rs12546365 | 0.151278189 | 0.066637278 | 0.023197053 |
| rs12578595 | 0.159112874 | 0.066722209 | 0.017092761 |
| rs1260326 | 0.160128421 | 0.066816325 | 0.016550399 |
| rs12625671 | 0.159784751 | 0.06664416 | 0.016503745 |
| rs12692723 | 0.158883255 | 0.066635958 | 0.017109456 |
| rs12698897 | 0.156794257 | 0.066704149 | 0.01874356 |
| rs12763565 | 0.151035492 | 0.066687169 | 0.023522753 |
| rs12910361 | 0.153468007 | 0.066795914 | 0.021586515 |
| rs13073970 | 0.155730923 | 0.066636615 | 0.019438284 |
| rs13086642 | 0.157819829 | 0.066623554 | 0.017844486 |
| rs13162708 | 0.15907229 | 0.066619659 | 0.016951038 |
| rs13266634 | 0.140761454 | 0.067157555 | 0.036083224 |
| rs13292347 | 0.155619334 | 0.066683294 | 0.019611019 |
| rs1362891 | 0.15994948 | 0.066675046 | 0.016442578 |
| rs139722172 | 0.15239723 | 0.066766834 | 0.022458132 |
| rs140896965 | 0.15986056 | 0.067150194 | 0.017282507 |
| rs141330165 | 0.154469999 | 0.066771245 | 0.020699504 |
| rs142682088 | 0.157631148 | 0.066700934 | 0.018115323 |
| rs143708136 | 0.158654765 | 0.066641619 | 0.01727903 |
| rs146733600 | 0.155488916 | 0.066652994 | 0.019658005 |
| rs149336329 | 0.156310314 | 0.066615697 | 0.018953276 |
| rs1515104 | 0.147230308 | 0.066856851 | 0.027653136 |
| rs1567353 | 0.152570213 | 0.066637693 | 0.022047518 |
| rs1574285 | 0.160953457 | 0.066793997 | 0.015965667 |
| rs17036160 | 0.16172598 | 0.066942212 | 0.015696186 |
| rs1707498 | 0.156074013 | 0.066694664 | 0.01927716 |
| rs17101591 | 0.153604784 | 0.066580138 | 0.021051131 |
| rs17168486 | 0.155450453 | 0.066697022 | 0.019769418 |
| rs17496664 | 0.154034474 | 0.066657767 | 0.020842491 |
| rs1776899 | 0.155069176 | 0.066590204 | 0.019874513 |
| rs1794138 | 0.152715297 | 0.06658296 | 0.02181295 |
| rs1861410 | 0.151521664 | 0.06663036 | 0.022962175 |
| rs1966265 | 0.156576264 | 0.066639469 | 0.018793467 |
| rs1977832 | 0.140609179 | 0.067279833 | 0.036625373 |
| rs2010825 | 0.158161389 | 0.06664977 | 0.0176432 |
| rs2034761 | 0.158701838 | 0.06662757 | 0.01722243 |
| rs2115107 | 0.160958587 | 0.066661607 | 0.015754139 |
| rs2237897 | 0.14997249 | 0.067822366 | 0.027018241 |
| rs2270162 | 0.154665332 | 0.066611632 | 0.020238496 |
| rs2382249 | 0.15166947 | 0.066626182 | 0.022820618 |
| rs2578011 | 0.151568448 | 0.066747173 | 0.023160024 |
| rs2583938 | 0.158910696 | 0.066666455 | 0.017141059 |
| rs2648731 | 0.154379612 | 0.066702102 | 0.020642285 |
| rs2706710 | 0.146837779 | 0.0666302 | 0.027540373 |
| rs2796441 | 0.162228801 | 0.066811925 | 0.015176425 |
| rs2815625 | 0.156123081 | 0.066621617 | 0.019107359 |
| rs28375915 | 0.160395103 | 0.066693553 | 0.016174385 |
| rs28637955 | 0.147751499 | 0.066783998 | 0.026940505 |
| rs28642213 | 0.159545635 | 0.067045642 | 0.017328757 |
| rs3110641 | 0.163379668 | 0.066689562 | 0.014291428 |
| rs340874 | 0.160366477 | 0.066713854 | 0.016225837 |
| rs348330 | 0.157753414 | 0.066704894 | 0.018032742 |
| rs34872471 | 0.12726582 | 0.070038788 | 0.069205434 |
| rs35352848 | 0.158409521 | 0.06693848 | 0.017957459 |
| rs35385487 | 0.154992091 | 0.066615336 | 0.019982686 |
| rs35473599 | 0.154869215 | 0.066667711 | 0.020179055 |
| rs35895680 | 0.147199368 | 0.066718614 | 0.027365005 |
| rs35917376 | 0.152523223 | 0.066612854 | 0.022038913 |
| rs3743140 | 0.156548147 | 0.066645374 | 0.018825299 |
| rs3751297 | 0.155027802 | 0.066677659 | 0.020070161 |
| rs3764002 | 0.150139608 | 0.066670708 | 0.024324951 |
| rs3887925 | 0.162377676 | 0.066713344 | 0.014934606 |
| rs3918296 | 0.151292396 | 0.066588606 | 0.023083714 |
| rs39254 | 0.154355059 | 0.066643757 | 0.020551619 |
| rs392794 | 0.159890186 | 0.066734247 | 0.016578527 |
| rs406767 | 0.150072705 | 0.06673773 | 0.024531998 |
| rs4273712 | 0.154056051 | 0.066704708 | 0.020914582 |
| rs429358 | 0.147761549 | 0.0667381 | 0.026825278 |
| rs4517619 | 0.153568769 | 0.066623637 | 0.021165493 |
| rs4632135 | 0.158549127 | 0.066569275 | 0.017232167 |
| rs4731701 | 0.159107693 | 0.066687888 | 0.017039426 |
| rs4854343 | 0.164163154 | 0.066700816 | 0.013847833 |
| rs4901812 | 0.154751474 | 0.066630395 | 0.020204107 |
| rs4930045 | 0.154894654 | 0.066810459 | 0.020426546 |
| rs5215 | 0.153725791 | 0.066776135 | 0.021329153 |
| rs543159 | 0.152815505 | 0.06662972 | 0.021819027 |
| rs554833 | 0.153461645 | 0.066664834 | 0.021335851 |
| rs56094641 | 0.1593454 | 0.06732595 | 0.01794382 |
| rs56218782 | 0.158037967 | 0.066632385 | 0.01770219 |
| rs56348580 | 0.148412132 | 0.066735586 | 0.026156321 |
| rs576674 | 0.16003295 | 0.06667559 | 0.016387326 |
| rs58090211 | 0.156921237 | 0.066577042 | 0.018423882 |
| rs62262091 | 0.155570874 | 0.06671357 | 0.019704769 |
| rs62319060 | 0.15282839 | 0.06663174 | 0.021811905 |
| rs62405419 | 0.155928288 | 0.066615895 | 0.019247268 |
| rs62508166 | 0.162139038 | 0.066910943 | 0.015384175 |
| rs633715 | 0.158576684 | 0.066650548 | 0.017349059 |
| rs6438138 | 0.158708348 | 0.066638718 | 0.017236502 |
| rs6453133 | 0.155880017 | 0.066652489 | 0.019351089 |
| rs6496742 | 0.158245489 | 0.066701593 | 0.017671061 |
| rs6554060 | 0.154308271 | 0.066617489 | 0.020540108 |
| rs6567160 | 0.162466631 | 0.066764355 | 0.014956375 |
| rs6813195 | 0.15635111 | 0.066749375 | 0.019162187 |
| rs6853272 | 0.154012849 | 0.066583328 | 0.020718006 |
| rs6878122 | 0.159814323 | 0.066673839 | 0.016531865 |
| rs6885132 | 0.151426102 | 0.066601278 | 0.022988749 |
| rs6919504 | 0.156226907 | 0.066573325 | 0.018941043 |
| rs6985028 | 0.161153464 | 0.066643073 | 0.015599311 |
| rs7030811 | 0.156878133 | 0.066599495 | 0.018495537 |
| rs7132351 | 0.154242061 | 0.066688923 | 0.020730405 |
| rs7132908 | 0.152767655 | 0.066637384 | 0.021875552 |
| rs7141 | 0.156421207 | 0.066616856 | 0.018870847 |
| rs71424153 | 0.159231718 | 0.066627717 | 0.016854244 |
| rs7172432 | 0.155460683 | 0.066760295 | 0.019878153 |
| rs7250869 | 0.14670481 | 0.06667447 | 0.027784581 |
| rs72640313 | 0.154567375 | 0.066613298 | 0.02032097 |
| rs72802365 | 0.153142364 | 0.0667815 | 0.021837331 |
| rs72830608 | 0.149894312 | 0.066652805 | 0.024519986 |
| rs72906810 | 0.158080741 | 0.066646705 | 0.017695858 |
| rs72951548 | 0.146813652 | 0.066699764 | 0.027728093 |
| rs72964564 | 0.148666421 | 0.06688769 | 0.026240927 |
| rs73221113 | 0.154399667 | 0.066650938 | 0.020528718 |
| rs73347525 | 0.153753944 | 0.06666465 | 0.021089468 |
| rs74862545 | 0.153991623 | 0.066730137 | 0.021017091 |
| rs75418188 | 0.152637712 | 0.066625504 | 0.021964557 |
| rs755249 | 0.154823926 | 0.066707538 | 0.020290299 |
| rs75872811 | 0.149734804 | 0.06667066 | 0.024711213 |
| rs76177300 | 0.160462404 | 0.06676703 | 0.016247052 |
| rs76895963 | 0.156826162 | 0.067924303 | 0.020952613 |
| rs7741521 | 0.156483291 | 0.066595586 | 0.018785786 |
| rs77464186 | 0.14049637 | 0.066995617 | 0.035984906 |
| rs7778167 | 0.161882146 | 0.066681224 | 0.01519482 |
| rs78470967 | 0.154617438 | 0.066692559 | 0.0204297 |
| rs8043085 | 0.150915157 | 0.066638475 | 0.023532015 |
| rs8100204 | 0.155600111 | 0.066646324 | 0.019558362 |
| rs8100562 | 0.16083364 | 0.066646288 | 0.015811306 |
| rs860262 | 0.155985204 | 0.066809544 | 0.019555217 |
| rs9265433 | 0.153825242 | 0.066768175 | 0.021229902 |
| rs9304665 | 0.155012268 | 0.066691298 | 0.020108069 |
| rs9368222 | 0.170596251 | 0.067809359 | 0.011875527 |
| rs9379084 | 0.15926905 | 0.066703937 | 0.016954135 |
| rs9562987 | 0.156133512 | 0.066626554 | 0.019108235 |
| rs972119 | 0.158252208 | 0.06664818 | 0.017575518 |
| rs9844972 | 0.154361298 | 0.066680238 | 0.020615766 |
| rs9873519 | 0.153200838 | 0.066631068 | 0.021491297 |
| All | 0.155400487 | 0.066554211 | 0.019546243 |
